# Supplementary material
Source: publisher site journal article supplement (https://static.cambridge.org/content/id/urn:cambridge.org:id:article:S1368980020001433/resource/name/S1368980020001433supp001.docx)
Supplement: Supplementary file 1 [file S1368980020001433supp001.docx]

**Key Informant Questions**

1. How would you describe the current state of public health practice in healthy eating and food environments?
2. What are high priority public health nutrition issues in Ontario right now? Why? How are you planning to address them?
3. What are the largest barriers to public health nutrition practice in your public health unit (PHU)? Region? In Ontario?
4. Where are the current opportunities to strengthen public health nutrition practice in your PHU? Region? In Ontario?
5. What would you say are the greatest needs for successful public health nutrition practice in your PHU? Region? In Ontario?
6. This role is intended to support public health units at a systems-level (i.e., having the greatest impact on the greatest number of PHUs). Considering Public Health Ontario’s (PHO) role to provide scientific and technical support, what can I do, as the Healthy Eating and Food Environment specialist from PHO, to support your work?
7. If I had an opportunity to visit a few PHUs to better understand public health practice in healthy eating and food environments, where would you suggest and why?
8. Finally, what else would you like to tell me about your public health practice?

**Focus Group Questions**

1. Can you describe the context of public health nutrition programming work related to addressing diet-related health outcomes in your PHU?
   1. How does your PHU go about developing (and delivering) public health nutrition programming – who is involved?
   2. How are decisions made?
   3. How is this process similar and/or different to other program areas?
2. What supports would assist the planning and implementation of your public health nutrition programming?
3. What resources does your PHU have to do this work?
4. What are the top three public health nutrition issues for your PHU?
   1. Why?
5. What are the top challenges your PHU faces when working on these issues?
